# Supplementary material for: Plant Derived Bio-based Liquid Crystal Elastomer with On-demand Mechanochromic Response
Source: Research Square preprint supplement (doi:10.21203/rs.3.rs-6702808/v1), 2025-06-03
Supplement: Supplementary file 1 [file d3960ea9240f50dda6ac1c9c.docx]

**Supplementary Material**

**Hydroxypropyl Cellulose Derived Bio-based Liquid Crystal Elastomer with On-demand Mechanochromic Response**

Lukuan Guo1,‖, Jing Sun1,‖, Xinxin Yan1, Xuemei Ge1, Guang Chu2,*, Lijie Li3, Pan Chen3, Junlong Song1, Yongcan Jin1, Jiaqi Guo1,*

1Jiangsu Co-Innovation Center for Efficient Processing and Utilization of Forest Resources and Joint International Research Lab of Lignocellulosic Functional Materials, Nanjing Forestry University, Nanjing, 210037, China

2School of Chemistry and Chemical Engineering, Southeast University, Nanjing 211189, China

3School of Materials Science and Engineering, Beijing Institute of Technology, Beijing, 100081, P.R. China

‖Contribute equally

**Corresponding Authors**: Guang Chu(chuguang88@gmail.com)

Jiaqi Guo(jiaqi.guo@njfu.edu.cn)

**1. Experimental Analysis of Ionic Solutions’ Influence on HPC-PAA based chiral nematic LCE Performance**

To investigate the influence of ions on the mechanical properties of HPC-PAA elastomer, a series of soaking experiments were conducted. Firstly, the HPC-PAA elastomer was immersed in 1 M ion solutions containing identical Cl⁻ anions but varying cations (Ca²⁺, Fe³⁺, Na⁺, Zn²⁺, K⁺) for 90 minutes. Subsequently, the elastomer was soaked in 1 M ion solutions with identical Na⁺ cations but varying anions (Cl⁻, SO₄²⁻, CO₃²⁻) for 90 minutes. Finally, to examine the effect of ion solution concentrations on the elastomer, it was soaked in CaCl₂ solutions with different concentrations (0.5, 0.6, 0.75, 1.0 M) and NaCl solutions with different concentrations (0.8, 1.0, 1.2, 1.4 M) for 90 mins.

**
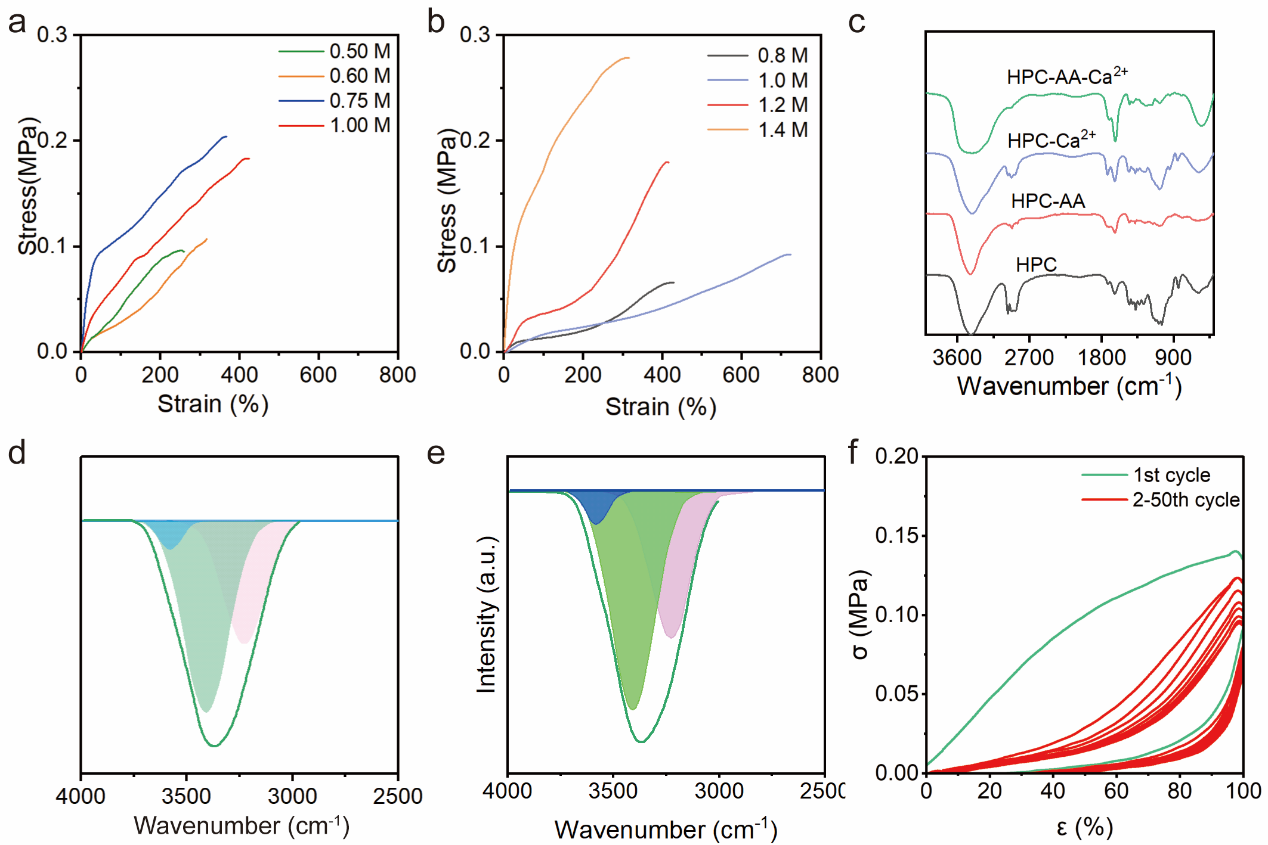
**

**Fig.S1 a** The tensile curves of elastomers prepared in the CaCl2 solutions with different concentrations **b** The tensile curves of elastomers prepared in the NaCl solutions with different concentrations **c** FT-IR spectrum of the integration of diverse components of HPC-AA elastomers obtained by soaking in CaCl2 solution **d & e** Split-peak fitting of hydrogen bonding (H-bond) peaks on FT-IR (4000 ~ 2500 cm-1) of HPC-AA14% elastomer prepared in NaCl, CaCl2, respectively. (The peak of different color: Blue: weak H-bond; Green: medium H-bond; Red: Strong H-bond) **f** The 50th stretching-relaxation cycles (*σ*-*ε*) curves of the HPC-AA14% (Na2SO4) elastomer


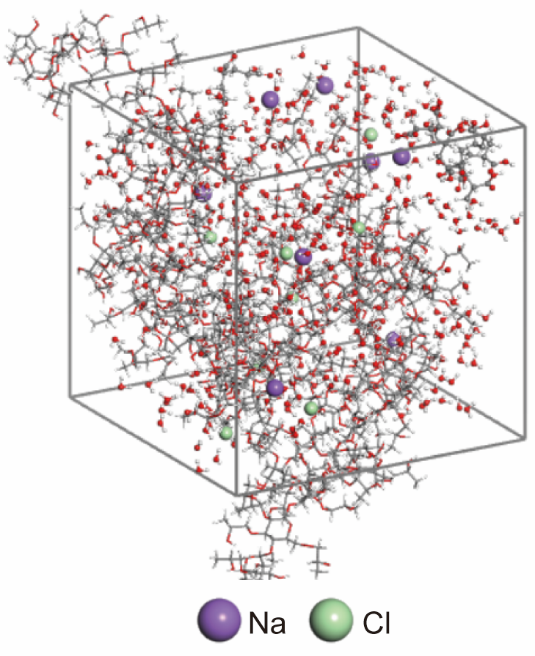


**Fig.S2 a** HPC-AA elastomers Molecular simulation (MD) of HPC-AA elastomers prepared in NaCl


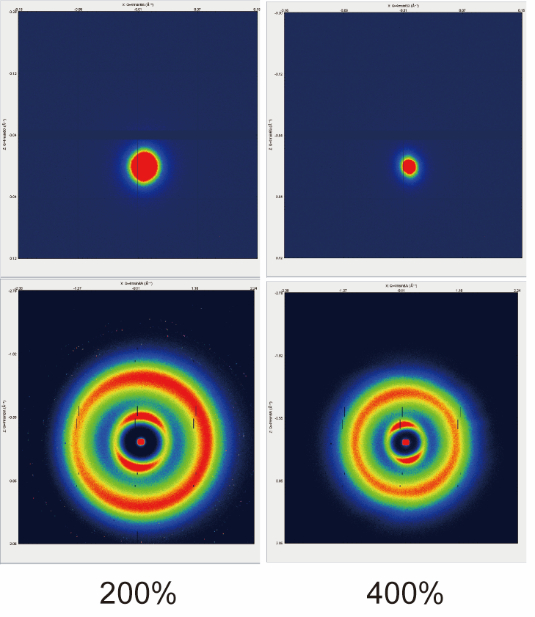


**Fig.S3** X-ray scattering patterns of the 200%, 400% stretched elastomer. Top row: SAXS patterns; Bottom row: WAXS patterns


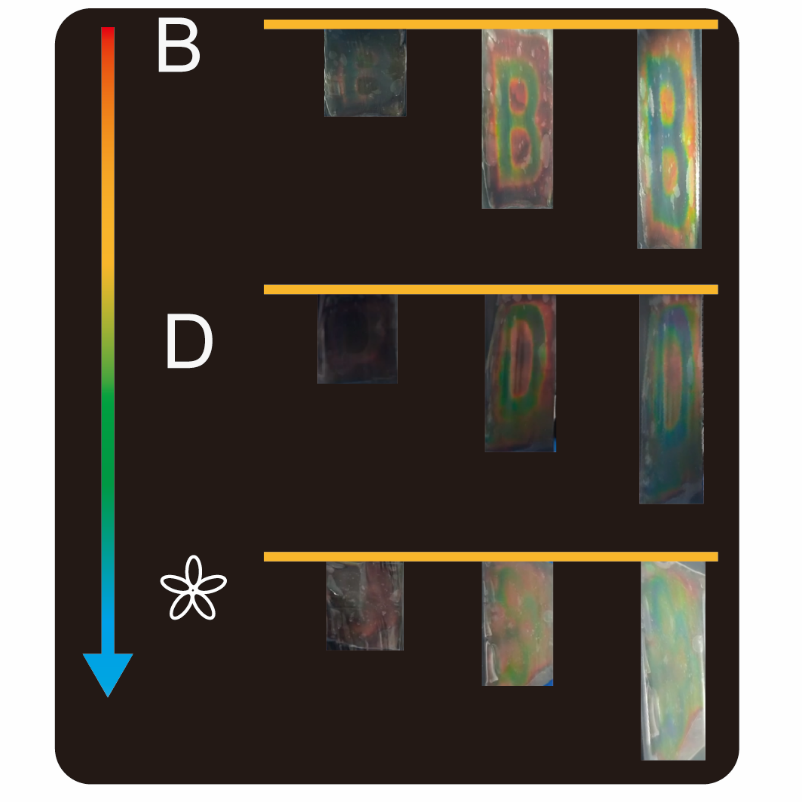


**Figure S4**. Pattern encryption: The letters B, D and patterns of flower on the elastomer do not appear noticeable when not stretched, while they show a clear outline when stretched from red to blue-green.
